# Supplementary material for: Rapamycin improves Graves’ orbitopathy by suppressing CD4+ cytotoxic T lymphocytes
Source: PubMed Central journal article supplement (PMC9977423; doi:10.1172/jci.insight.160377), 2023-02-08
Supplement: jciinsight-8-160377-s023.pdf [file jciinsight-8-160377-s023.pdf]

**Supplementary table 1 Comparisons of gene expression between different groups.**

| Type          | Genes  | <i>P</i> -adj <sup>a</sup><br>(control group vs.<br>GO model group) | <i>P</i> -adj<br>(control group vs.<br>rapamycin treatment group) |
|---------------|--------|---------------------------------------------------------------------|-------------------------------------------------------------------|
|               | THEMIS | 0.003247                                                            | 0.145851                                                          |
| Immune        | TRAT1  | 0.017754                                                            | 0.082263                                                          |
| Response      | ITK    | 0.002208                                                            | 0.100777                                                          |
|               | TXK    | 0.013620                                                            | 0.096480                                                          |
| Cell-Cell     | LEF1   | 0.008076                                                            | 0.129240                                                          |
| Adhesion      | CD247  | 0.003968                                                            | 0.232243                                                          |
|               | TNR    | 0.010939                                                            | 0.271147                                                          |
|               | IFNG   | 0.022515                                                            | 0.212678                                                          |
| Inflammation  | CCL5   | 0.015533                                                            | 0.193604                                                          |
| and           | CCR7   | 0.046903                                                            | 0.053325                                                          |
| Chemotaxis    | CXCR6  | 0.001652                                                            | 0.209455                                                          |
|               | CXCR3  | 0.003570                                                            | 0.588464                                                          |
|               | CXCL10 | 0.032633                                                            | 0.166478                                                          |
|               | GZMM   | 0.005989                                                            | 0.415911                                                          |
| Cytolysis and | GZMK   | 0.006840                                                            | 0.151235                                                          |
| Cell Killing  | PRF1   | 0.036242                                                            | 0.156871                                                          |
|               | ALB    | 0.001302                                                            | 0.180068                                                          |
|               | F2RL1  | 0.012858                                                            | 0.119809                                                          |

Expressed gene analysis was performed for mouse splenocytes. Compared with the Ad-EGFP group, the GO model group showed significantly increased gene expression related to the immune response, cell-cell adhesion, inflammation, chemotaxis, cytolysis and cell killing ( $p < 0.05$ ), while the rapamycin treatment group showed no significant differences ( $p > 0.05$ ).

<sup>a</sup> *P*-adj: adjusted *P* value.

**Supplementary table 2. The orbital pathology in GO model and rapamycin treatment groups.**

| Groups              | Fibrosis <sup>a</sup><br>(mm <sup>3</sup> ) | Adipogenesis <sup>b</sup><br>(mm <sup>2</sup> ) | Orbitopathy <sup>c</sup> |
|---------------------|---------------------------------------------|-------------------------------------------------|--------------------------|
| GO model            | 0.3186                                      | <b>0.06088</b>                                  | +                        |
| GO model            | <b>0.4088</b>                               | <b>0.04994</b>                                  | +                        |
| GO model            | 0.3249                                      | 0.03885                                         | —                        |
| GO model            | <b>0.4552</b>                               | <b>0.05946</b>                                  | +                        |
| GO model            | <b>0.4195</b>                               | <b>0.06884</b>                                  | +                        |
| GO model            | 0.3253                                      | <b>0.05042</b>                                  | +                        |
| GO model            | <b>0.4086</b>                               | <b>0.04710</b>                                  | +                        |
| GO model            | <b>0.5069</b>                               | 0.03372                                         | +                        |
| Rapamycin treatment | 0.2690                                      | 0.04187                                         | —                        |
| Rapamycin treatment | 0.2393                                      | 0.04089                                         | —                        |
| Rapamycin treatment | <b>0.4753</b>                               | <b>0.04788</b>                                  | +                        |
| Rapamycin treatment | 0.2473                                      | 0.02733                                         | —                        |
| Rapamycin treatment | 0.3034                                      | <b>0.05153</b>                                  | +                        |
| Rapamycin treatment | 0.2398                                      | 0.03152                                         | —                        |
| Rapamycin treatment | <b>0.4763</b>                               | 0.03569                                         | +                        |
| Rapamycin treatment | 0.2629                                      | 0.03135                                         | —                        |

<sup>a</sup> Fibrosis: control mice mean+2 S.D.=0.3352 mm<sup>3</sup>. higher values (bold) indicated significant positivity.

<sup>b</sup> Adipogenesis: control mice mean+2 S.D.=0.04553 mm<sup>2</sup>. higher values (bold) indicated significant positivity.

<sup>c</sup> Orbitopathy: + : existing orbital pathogenesis including fibrosis and adipogenesis. — : no evidence of fibrosis and adipogenesis.

**Supplementary table 3. Clinical information of steroid-refractory GO patients treated by rapamycin.**

| No. | Age/<br>Sex <sup>a</sup> | Thyroid<br>condition <sup>b</sup> | Orbitopathy<br>onset<br>(months) <sup>c</sup> | Tough<br>levels<br>(ug/l) <sup>d</sup> |      | CAS <sup>e</sup> | Diplopia <sup>f</sup> | EOMy <sup>g</sup> |
|-----|--------------------------|-----------------------------------|-----------------------------------------------|----------------------------------------|------|------------------|-----------------------|-------------------|
| 1   | 58/M                     | EGO                               | 11                                            | 3.9                                    | Pre  | 1                | 4                     | -3                |
|     |                          |                                   |                                               |                                        | Post | 0                | 4                     | -3                |
| 2   | 45/M                     | GO                                | 16                                            | N/A                                    | Pre  | 1                | 4                     | -3                |
|     |                          |                                   |                                               |                                        | Post | 0                | 3                     | -1                |
| 3   | 43/M                     | GO                                | 10                                            | 5.3                                    | Pre  | 2                | 4                     | -2                |
|     |                          |                                   |                                               |                                        | Post | 0                | 1                     | -1                |
| 4   | 33/F                     | GO                                | 11                                            | 6.5                                    | Pre  | 4                | 4                     | -1                |
|     |                          |                                   |                                               |                                        | Post | 0                | 2                     | 0                 |
| 5   | 57/F                     | GO                                | 28                                            | 7.1                                    | Pre  | 1                | 4                     | -3                |
|     |                          |                                   |                                               |                                        | Post | 0                | 4                     | -3                |

<sup>a</sup> Age/Sex: Age: Age of disease onset. M: Male. F: Female.

<sup>b</sup> Thyroid condition: EGO=Euthyroid Graves orbitopathy, GD=Grave's disease.

<sup>c</sup> Orbitopathy onset: the time between orbitopathy onset and the use of rapamycin.

<sup>d</sup> Tough levels: the aimed tough levels of rapamycin were 5-10 ng/ml for patients who received 2 mg daily for 12 months.

<sup>e</sup> CAS: Clinical activity score.

<sup>f</sup> Gorman diplopia scale was used to score the diplopia as following: 1, no diplopia; 2, gaze - evoked diplopia; 3, intermittent primary-gaze diplopia; 4, constant primary-gaze (intractable) diplopia.

<sup>g</sup> EOMy restriction was scored according to the position of limbus at 9 cardinal gaze photos. We scored 0 for full excursion and -5 for failure to reach the midline (-4 to -1 for excursion in 25% increments), and the scores in the most restricted duction were recorded.

**Supplementary table 4. Antibodies used in the methods section.**

|                                      | antibody                             | catalog#       | Company          |
|--------------------------------------|--------------------------------------|----------------|------------------|
| Western blot                         | anti-human mTOR (7C10)               | 2983           | CST <sup>a</sup> |
|                                      | anti-human p-mTOR (Ser2448, D9C2)    | 5536           | CST              |
|                                      | anti-human p70S6K (49D7)             | 2708           | CST              |
|                                      | anti-human p-p70S6K (Thr421/Ser424)  | 9204           | CST              |
|                                      | anti-human GAPDH (14C10)             | 2118           | CST              |
|                                      | anti-human $\beta$ -actin (D6A8)     | 8457           | CST              |
| Flow<br>cytometry                    | FITC anti-human CD4                  | 11-0049-08     | eBioscience      |
|                                      | APC anti-human GZMB                  | GRB05          | eBioscience      |
|                                      | PE cy/7 anti-human PRF1              | 25-9994-42     | eBioscience      |
|                                      | PE cy/7 anti-human IFNG              | 25-7319-82     | eBioscience      |
|                                      | PE anti-human p-S6K (Ser235, Ser236) | 12-9007-41     | eBioscience      |
|                                      | PE cy/7 anti-human p-mTOR (ser 2448) | 25-9718-41     | eBioscience      |
|                                      | PE anti-human RORG                   | 12-6981-80     | eBioscience      |
|                                      | PE anti-human FOXP3                  | 12-4776-42     | eBioscience      |
|                                      | PerCP cy5.5 anti-human CCL5          | 515507         | Biolegend        |
|                                      | FITC anti-human Tbet                 | 644811         | Biolegend        |
|                                      | PerCP cy5.5 anti-human GATA3         | 653811         | Biolegend        |
|                                      | PE cy/7 anti-human IL10              | 501419         | Biolegend        |
|                                      | PerCP cy5.5 anti-human CX3CR1        | 341614         | Biolegend        |
|                                      | APC cy/7 anti-human CD4              | 317418         | Biolegend        |
|                                      | PE anti-human TGFB1                  | 562260         | BD               |
|                                      | Histological<br>examination          | anti-mouse CD3 | ER80501          |
| anti-human/mouse CD4 (MT310)         |                                      | sc-19641       | Santa Cruz       |
| anti-human/mouse HLA-DR (TAL 1B5)    |                                      | sc-53319       | Santa Cruz       |
| anti-human/mouse GZMB (EPR22645-206) |                                      | ab255598       | Abcam            |
|                                      | anti-human GZMB                      | ab4059         | Abcam            |

---

|                                                       |          |            |
|-------------------------------------------------------|----------|------------|
| anti-human/mouse cleaved caspase-3<br>(Asp175) (5A1E) | 9664     | CST        |
| anti-human/mouse CD90                                 | GB113753 | Servicebio |

---

<sup>a</sup> CST: Cell Signaling Technology

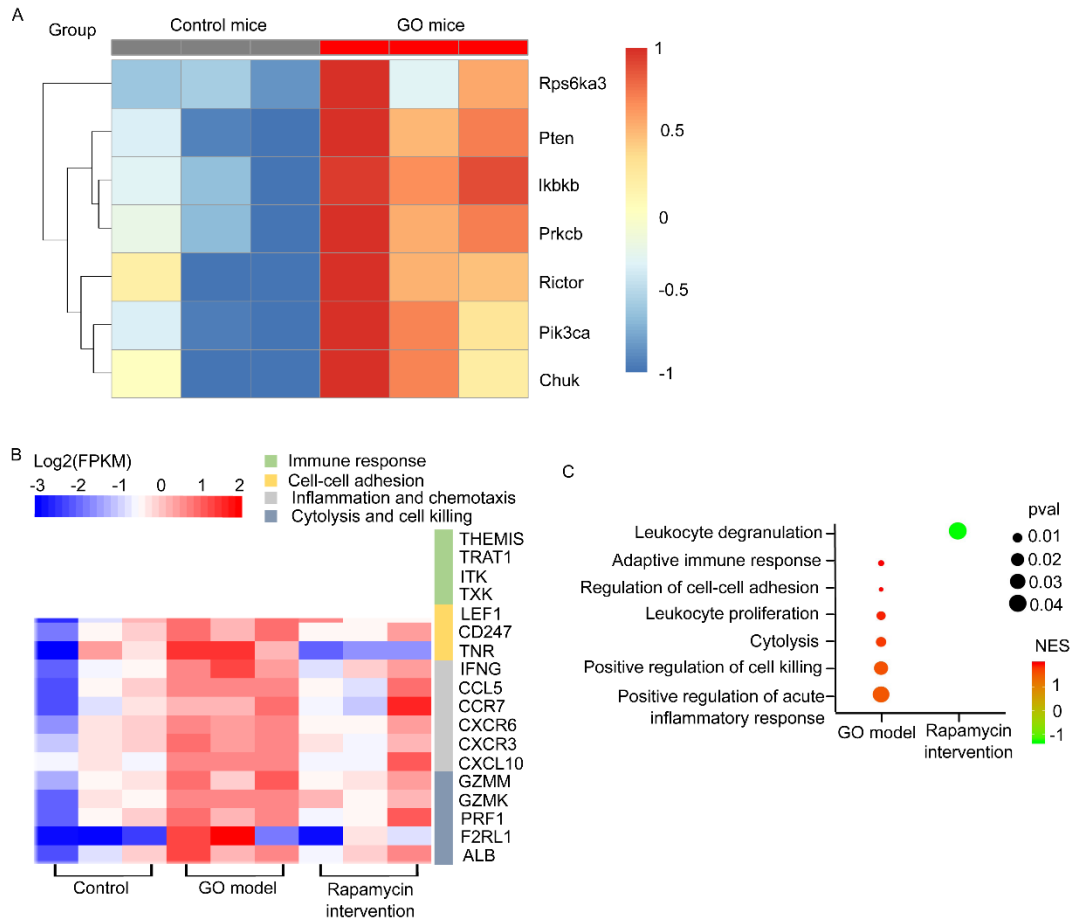

**Supplementary Figure 1: RNA-sequencing results of splenocytes of mice (n=3 for each group).** (A) Heatmap of gene expression related to mTOR signaling pathway in splenocytes from mice. Adjusted  $P < 0.05$ . (B) Heatmap of gene expression related to the immune response, cell-cell adhesion, inflammation, chemotaxis, cytolysis and cell killing in splenocytes from the three groups of mice. The fragments per kilobase per million (FPKM) of expressed genes were indicated by color. (C) Gene set enrichment analysis (GSEA) for the indicated pathways in the transcriptome of GO model and rapamycin intervention mice versus control mice. P values indicated by circle size. Normalized enrichment scores (NES) of indicated pathways were indicated by color, and the positive scores indicated positive correlation.

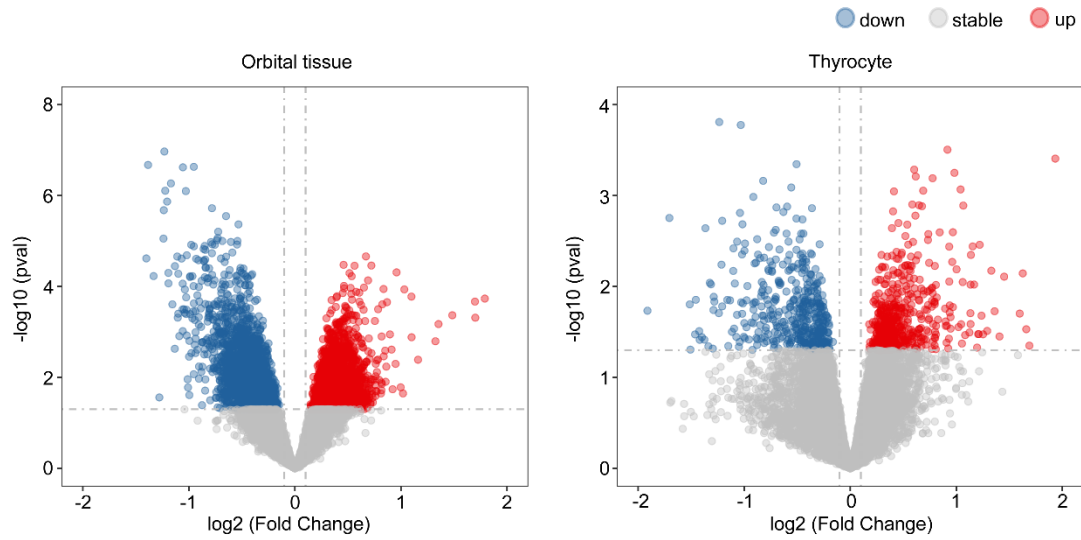

**Supplementary Figure 2: Volcano plots of DEGs in the orbital tissues and thyrocytes of GO patients.** Two microarray datasets (GSE9340 and GSE58331) of GO patients were obtained from the NCBI Gene Expression Omnibus (GEO) and ArrayExpress and analyzed. There were 4,861 and 690 differentially expressed genes (DEGs) in the GO gene set identified in the GSE58331 dataset (orbital tissues: GO vs. HC) and in the GSE9340 dataset (thyrocytes: GO vs. GD), respectively.

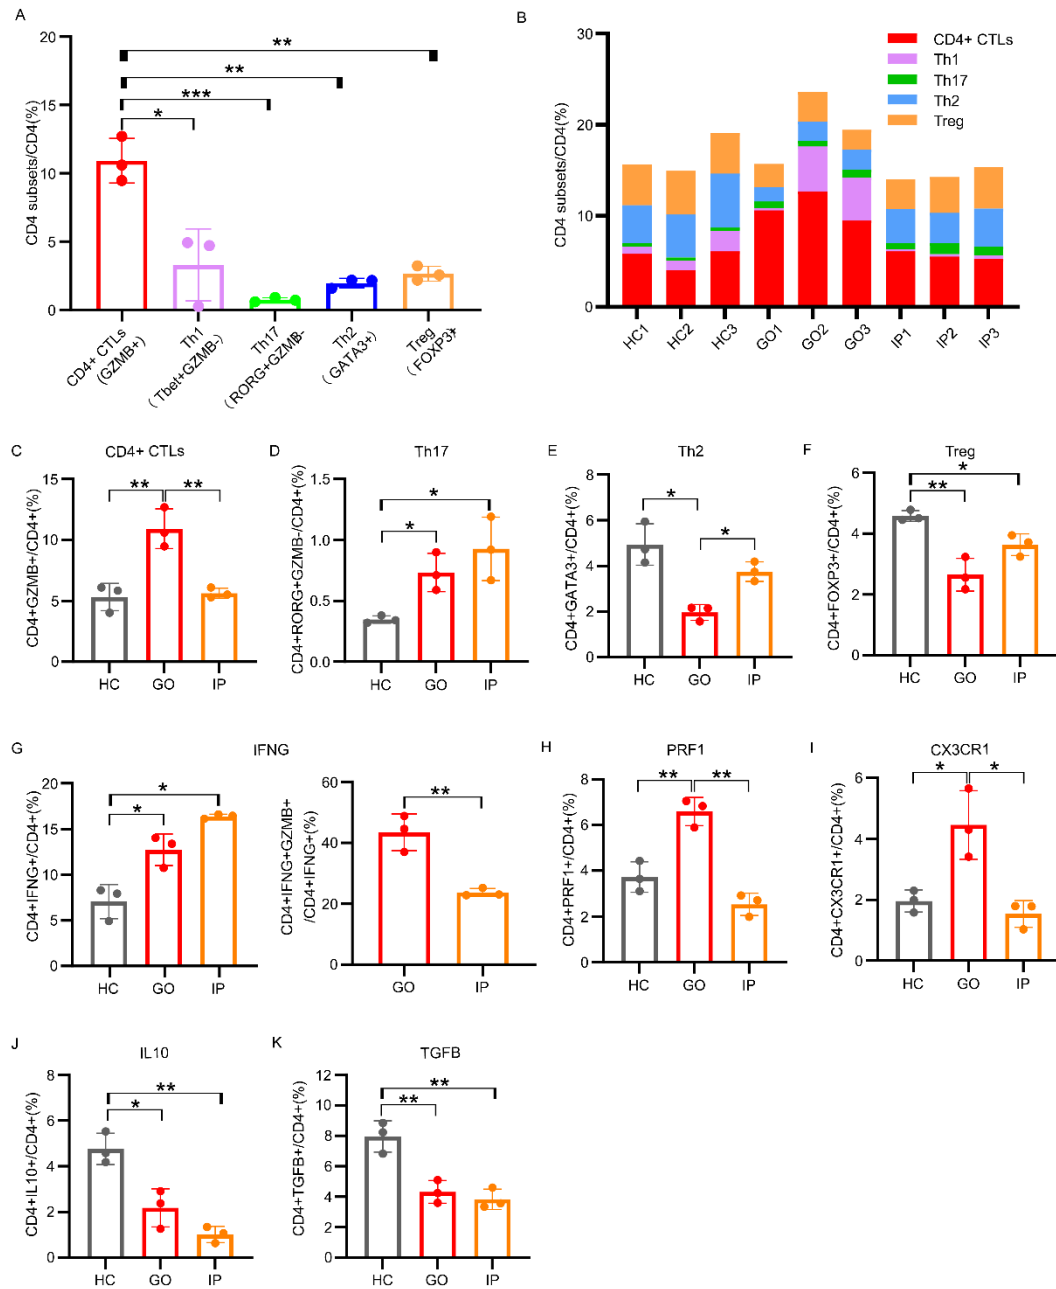

**Supplementary Figure 3: The proportion of CD4+ CTLs was increased in the PBMCs of GO patients.** (A) Flow cytometric analysis of the proportions of major CD4+ T cells subsets in the PBMCs of GO patients. (B-F) Flow cytometric analysis of the proportions of major CD4+ T cells subsets in the PBMCs of healthy controls (HC), GO patients and orbital inflammatory pseudotumor (IP) patients (n=3). (G-I) Flow cytometric analysis of the proportions of CD4+IFNG+, CD4+PRF1+ and CD4+CX3CR1+ cells in the PBMCs of HC, GO patients and IP patients (n=3); these phenotypes indicated the cell functions of inflammation, cytotoxicity and chemotaxis, respectively. (J-K) Flow cytometric analysis of the proportions of CD4+IL10+ and CD4+TGFB+ cells in the PBMCs of HC, GO patients and IP patients (n=3); these phenotypes indicated the cell functions of Tregs. Values represent the mean±SEM. Two-tailed, independent samples t-tests (A-K): \* $P < 0.05$ , \*\* $P < 0.01$ , \*\*\* $P < 0.001$ .



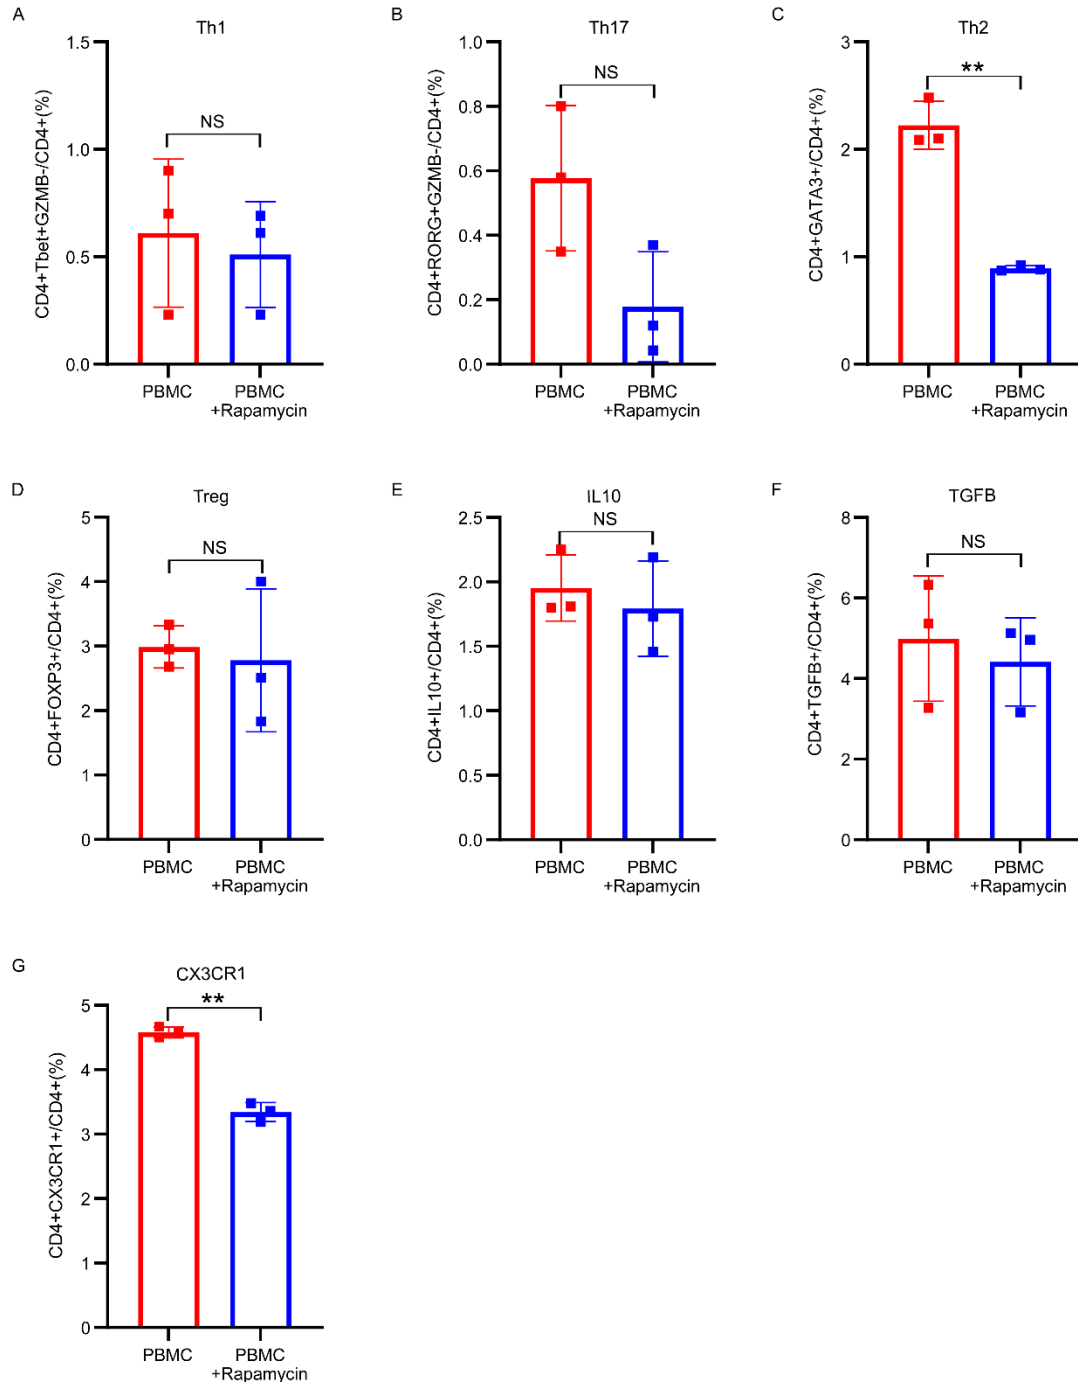

**Supplementary Figure 4: Flow cytometric analysis of the proportions and functions of other major CD4+ T cell subsets in PBMC after the treatment of rapamycin. (A-C)** Flow cytometric analysis of the proportions of Th1、Th2 and Th17 in the PBMCs after the treatment of rapamycin (n=3). **(D-F)** Flow cytometric analysis of the proportions of Tregs, CD4+IL10+ and CD4+TGFB+ cells in the PBMCs after the treatment of rapamycin (n=3). **(G)** Flow cytometric analysis of the proportions of CD4+CX3CR1+ cells in the PBMCs after the treatment of rapamycin (n=3). Values represent the mean±SEM. Two-tailed, independent samples t-tests **(A-G)**: \*\**P*<0.01.

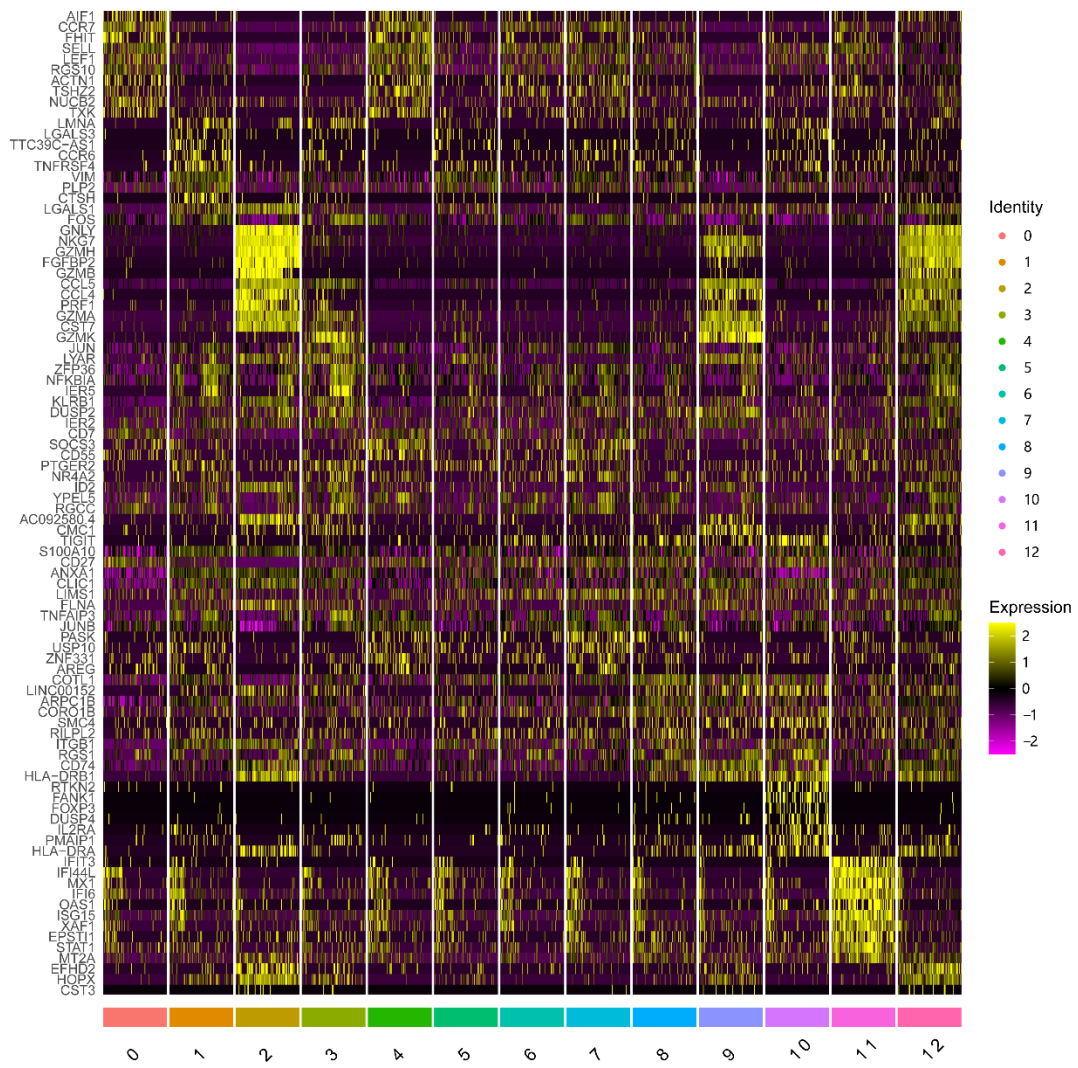

**Supplementary Figure 5: Heatmap of the top 20 genes per cluster with the number of DEGs indicated for the GO patients. Adjusted  $P < 0.05$ .**

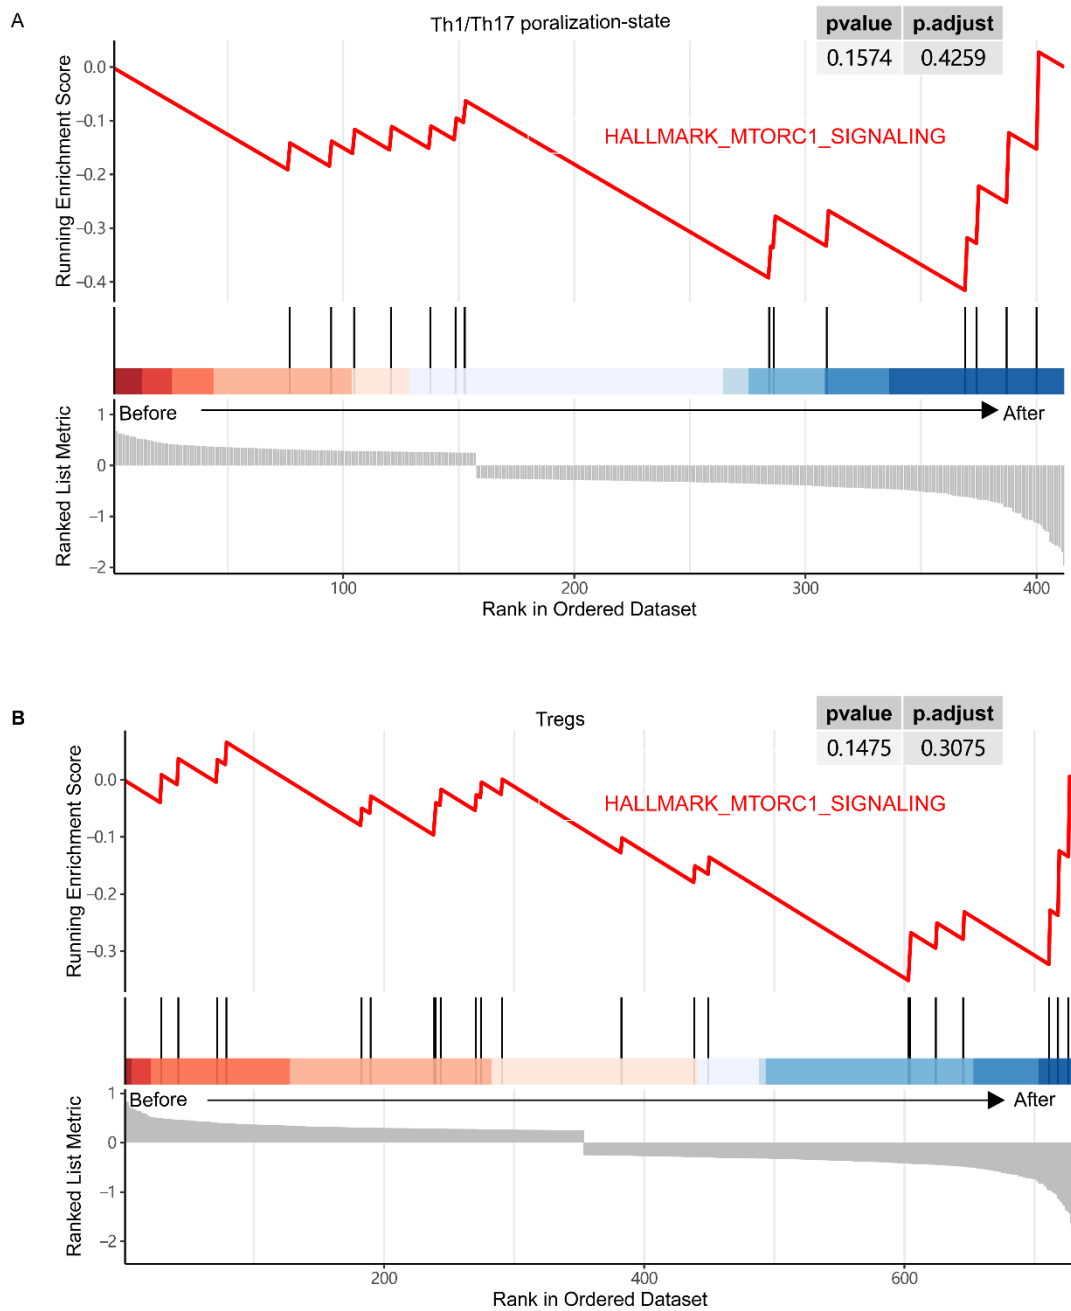

**Supplementary Figure 6: GSEA enrichent plots for mTORC1 signaling gene set in the transcriptome of Th1/Th17-polarized cells and Tregs. (A)** GSEA enrichent plots for mTORC1 signaling gene set in the transcriptome of Th1/Th17-polarized cells before and after treatment. **(B)** GSEA enrichent plots for mTORC1 signaling gene set in the transcriptome of Tregs before and after treatment.
